# Supplementary material
Source: Springer Nature journal article supplement (https://www.springermedizin.de/resource/supplementary/12865_2008_224_MOESM2_ESM.pdf/9427624)
Supplement: MOESM2 [file 9427624]

Chemoattractant activity

**A** RP-HPLC #

**B cell Lymphoblasts**

**MLN Lymphocytes**

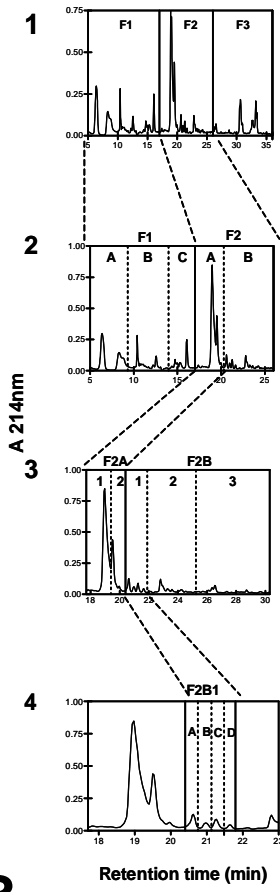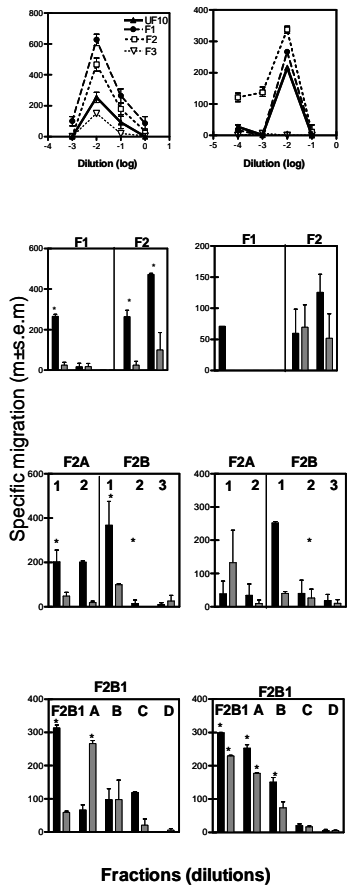

**B**

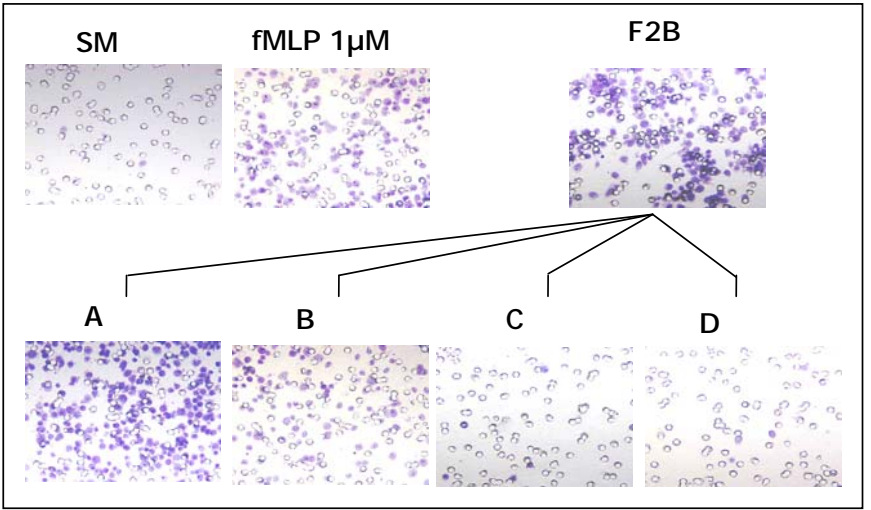

Illustration of B lymphoblasts L14 onto filter (magnitude X100)
